# Supplementary material for: HHLA2 and PD-L1 co-expression predicts poor prognosis in patients with clear cell renal cell carcinoma
Source: PubMed Central journal article supplement (PMC7057441; doi:10.1136/jitc-2019-000157), 2020-01-19
Supplement: jitc-2019-000157supp001.pdf [file jitc-2019-000157supp001.pdf]

**Table S1.** Basic characteristics of patients

| Variables     |           | Training cohort     | Validation cohort   |
|---------------|-----------|---------------------|---------------------|
|               |           | (n=206)             | (n=197)             |
|               |           | Number of cases (%) | Number of cases (%) |
| Age           | 54(19-84) |                     |                     |
| (y, Median    | <53       | 90(43.7%)           | 102(51.8%)          |
| range)        | ≥53       | 116(56.3%)          | 95(48.2%)           |
| Gender        | Male      | 134(65.0%)          | 141(71.6%)          |
|               | Female    | 72(35.0%)           | 56(28.4%)           |
| T stage       | T1        | 116(56.3%)          | 118(59.9%)          |
|               | T2        | 48(23.3%)           | 39(19.8%)           |
|               | T3        | 32(15.5%)           | 33(16.8%)           |
|               | T4        | 10(4.9%)            | 7(3.6%)             |
| N stage       | N0        | 187(90.8%)          | 181(91.9%)          |
|               | N1        | 19(9.2%)            | 16(8.1%)            |
| M stage       | M0        | 181(87.9%)          | 185(93.9%)          |
|               | M1        | 25(12.1%)           | 12(6.1%)            |
| Necrosis      | Absent    | 149(72.3%)          | 151(76.6%)          |
|               | Present   | 57(27.7%)           | 46(23.4%)           |
| MVI           | Absent    | 179(86.9%)          | 169(85.8%)          |
|               | Present   | 27(13.1%)           | 28(14.2%)           |
| Fuhrman grade | G1        | 42(20.4%)           | 44(22.3%)           |
|               | G2        | 94(45.6%)           | 85(43.1%)           |
|               | G3        | 55(26.7%)           | 49(24.9%)           |
|               | G4        | 15(7.3%)            | 19(9.6%)            |
| HHLA2         | Negative  | 115(55.8%)          | 116(58.9%)          |
|               | Positive  | 91(44.2%)           | 81(41.1%)           |
| PD-L1         | Negative  | 138(67.0%)          | 134(68.0%)          |
|               | Positive  | 68(33.0%)           | 63(32.0%)           |

Abbreviations: MVI, microvascular invasion, HHLA2: Human endogenous retrovirus-H long terminal repeat-associating protein 2, PD-L1: Programmed death 1 ligand 1

**Table S2.** The association of PD-L1 expression level with clinicopathological characteristics

| Variables      | Training cohort(n=206) |                  |          |                  | Validation cohort(n=197) |                  |          |                 |
|----------------|------------------------|------------------|----------|------------------|--------------------------|------------------|----------|-----------------|
|                | Patients<br>NO.        | PD-L1 expression |          | <i>p</i> -value  | Patients<br>NO.          | PD-L1 expression |          | <i>p</i> -value |
|                |                        | Negative         | Positive |                  |                          | Negative         | Positive |                 |
| Age(y)         |                        |                  |          | 0.268            |                          |                  |          | 0.301           |
| <53            | 90                     | 64               | 26       |                  | 102                      | 66               | 36       |                 |
| ≥53            | 116                    | 74               | 42       |                  | 95                       | 68               | 27       |                 |
| Gender         |                        |                  |          | 0.702            |                          |                  |          | 0.479           |
| Male           | 134                    | 91               | 43       |                  | 141                      | 98               | 43       |                 |
| Female         | 72                     | 47               | 25       |                  | 56                       | 36               | 20       |                 |
| Necrosis       |                        |                  |          | <b>0.041</b>     |                          |                  |          | <b>0.001</b>    |
| Absent         | 149                    | 106              | 43       |                  | 151                      | 112              | 39       |                 |
| Present        | 57                     | 32               | 25       |                  | 46                       | 22               | 24       |                 |
| MVI            |                        |                  |          | <b>&lt;0.001</b> |                          |                  |          | 0.077           |
| Absent         | 179                    | 128              | 51       |                  | 169                      | 119              | 50       |                 |
| Present        | 27                     | 10               | 17       |                  | 28                       | 15               | 13       |                 |
| Fuhrman grade  |                        |                  |          | <b>0.002</b>     |                          |                  |          | <b>0.003</b>    |
| Low (1,2)      | 136                    | 101              | 35       |                  | 129                      | 97               | 32       |                 |
| High (3,4)     | 70                     | 37               | 33       |                  | 68                       | 37               | 31       |                 |
| TNM stage      |                        |                  |          | <b>0.003</b>     |                          |                  |          | <b>0.002</b>    |
| Low (I, II)    | 146                    | 107              | 39       |                  | 146                      | 108              | 38       |                 |
| High (III, IV) | 60                     | 31               | 29       |                  | 51                       | 26               | 25       |                 |

Abbreviations: MVI microvascular invasion; *p*-value <0.05 marked in bold font shows statistical significance.

**Table S3.** The association of HHLA2/PD-L1 co-expression level with clinicopathological characteristics in training cohort and validation cohort.

| Variables      | Training cohort |                           |          |           |                  | Validation cohort |                           |          |           |                  |
|----------------|-----------------|---------------------------|----------|-----------|------------------|-------------------|---------------------------|----------|-----------|------------------|
|                | Patients<br>NO. | HHLA2/PD-L1 co-expression |          |           |                  | Patients<br>NO.   | HHLA2/PD-L1 co-expression |          |           |                  |
|                |                 | Group I                   | Group II | Group III | <i>p</i> -value  |                   | Group I                   | Group II | Group III | <i>p</i> -value  |
| Age(y)         |                 |                           |          |           | 0.229            |                   |                           |          |           | 0.885            |
| <53            | 90              | 44                        | 30       | 16        |                  | 102               | 47                        | 34       | 21        |                  |
| ≥53            | 116             | 43                        | 29       | 24        |                  | 95                | 46                        | 32       | 17        |                  |
| Gender         |                 |                           |          |           | 0.698            |                   |                           |          |           | 0.051            |
| Male           | 134             | 54                        | 54       | 26        |                  | 141               | 74                        | 41       | 26        |                  |
| Female         | 72              | 33                        | 25       | 14        |                  | 56                | 19                        | 25       | 12        |                  |
| Necrosis       |                 |                           |          |           | <b>0.001</b>     |                   |                           |          |           | <b>&lt;0.001</b> |
| Absent         | 149             | 75                        | 51       | 23        |                  | 151               | 83                        | 46       | 22        |                  |
| Present        | 57              | 12                        | 28       | 17        |                  | 46                | 10                        | 20       | 16        |                  |
| MVI            |                 |                           |          |           | <b>&lt;0.001</b> |                   |                           |          |           | 0.385            |
| Absent         | 179             | 82                        | 70       | 27        |                  | 169               | 82                        | 57       | 30        |                  |
| Present        | 27              | 5                         | 9        | 13        |                  | 28                | 11                        | 9        | 8         |                  |
| Fuhrman grade  |                 |                           |          |           | <b>&lt;0.001</b> |                   |                           |          |           | 0.310            |
| Low (1,2)      | 136             | 75                        | 50       | 19        |                  | 129               | 66                        | 40       | 23        |                  |
| High (3,4)     | 70              | 12                        | 35       | 23        |                  | 68                | 27                        | 26       | 15        |                  |
| TNM stage      |                 |                           |          |           | <b>&lt;0.001</b> |                   |                           |          |           | <b>0.011</b>     |
| Low (I, II)    | 146             | 77                        | 77       | 59        |                  | 146               | 78                        | 42       | 26        |                  |
| High (III, IV) | 60              | 10                        | 29       | 21        |                  | 51                | 15                        | 24       | 12        |                  |

**Table S4.** Distribution of types of microenvironment in renal cell carcinoma based on HHLA2/PD-L1 co-expression of tumor cells and density of CD4 plus CD8-positive TILs

| Intra-tumoral<br>TILs | Training cohort           |              |               | Validation cohort         |              |               |
|-----------------------|---------------------------|--------------|---------------|---------------------------|--------------|---------------|
|                       | HHLA2/PD-L1 co-expression |              |               | HHLA2/PD-L1 co-expression |              |               |
|                       | Group I (%)               | Group II (%) | Group III (%) | Group I (%)               | Group II (%) | Group III (%) |
| Negative              | 41(19.9)                  | 26(12.7)     | 4(1.9)        | 45(22.8)                  | 28(14.2)     | 5(2.5)        |
| Positive              | 45(21.8)                  | 53(25.7)     | 37(18.0)      | 44(22.4)                  | 44(22.4)     | 31(15.7)      |

*Group I, both negative (HHLA2(-)/PD-L1(-)); Group II, single positive (HHLA2 (+)/PD-L1(-) or HHLA2(-)/PD-L1(+)); and Group III, both positive (HHLA2 (+)/PD-L1(+)).*

**Figure Legends**

**Figure S1.** Kaplan Meier survival curves for PFS and OS of patients with ccRCC according to HHLA2/PD-L1 co-expression in training cohort(a) and validation cohort(b).

**Figure S2.** Kaplan Meier survival curves for PFS and OS of patients with ccRCC according to HHLA2/PD-L1 co-expression in training cohort(a) and validation cohort(b).
