# Supplementary material for: HHLA2 and PD-L1 co-expression predicts poor prognosis in patients with clear cell renal cell carcinoma
Source: PubMed Central journal article supplement (PMC7057441; doi:10.1136/jitc-2019-000157), 2020-01-19

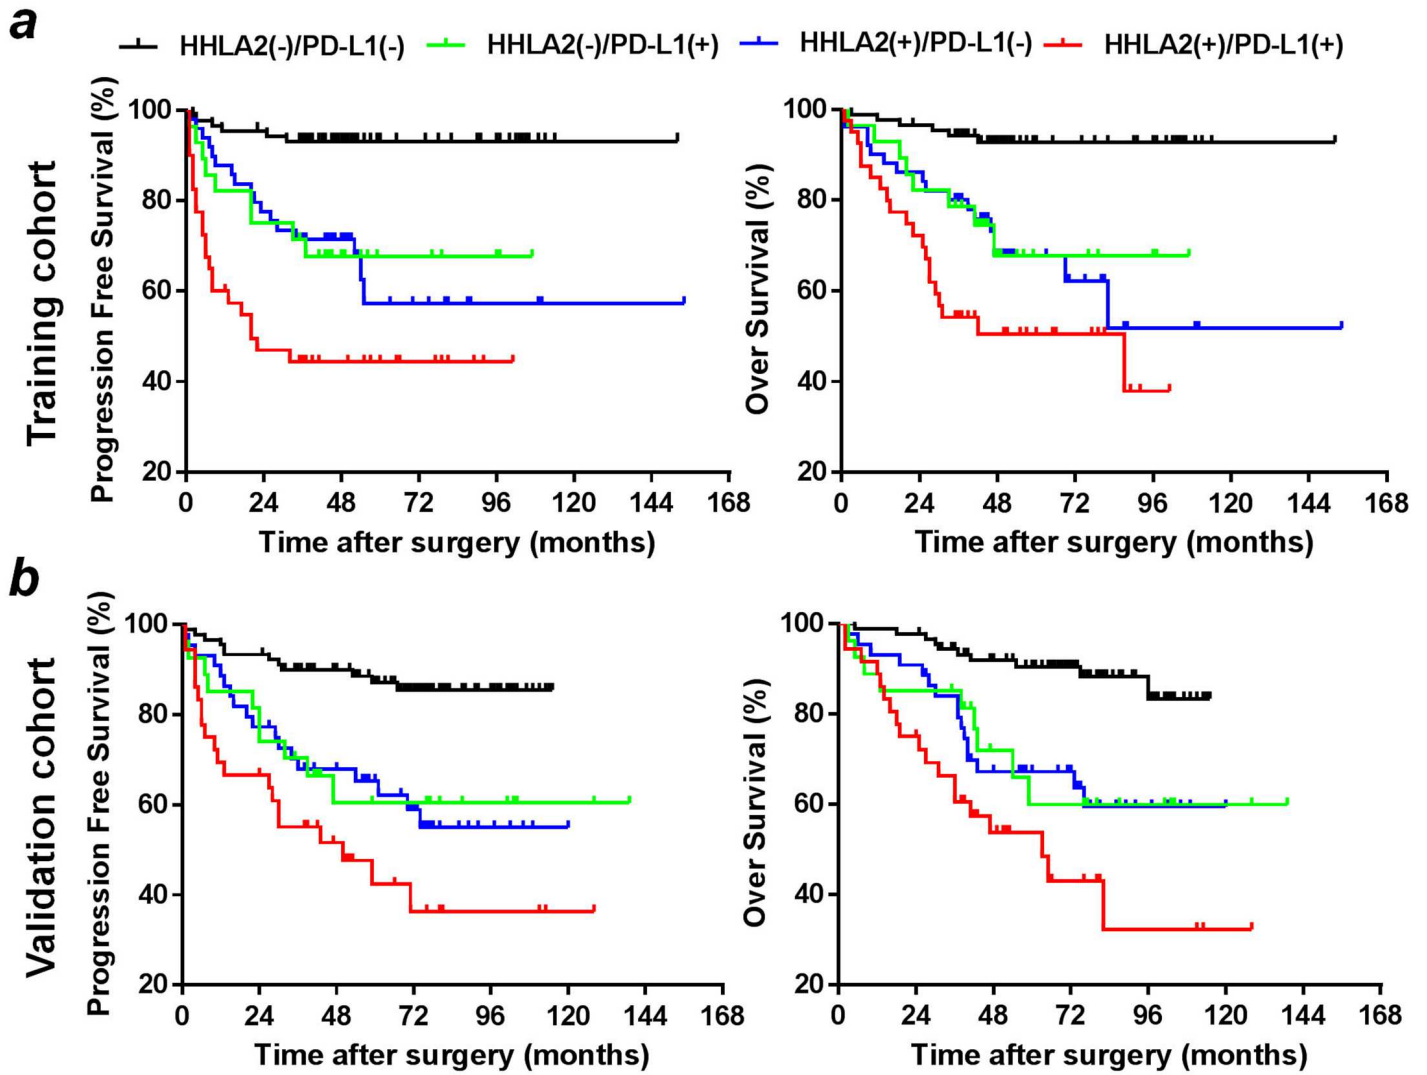

Supplement: jitc-2019-000157supp002.pdf [file jitc-2019-000157supp002.pdf]
